# Supplementary material for: Effect of Chitosan on Ruminal Fermentation and Microbial Communities, Methane Emissions, and Productive Performance of Dairy Cattle
Source: MDPI journal article supplement (doi:10.3390/ani13182861), 2023-09-08
Supplement: s1 [file s1]

**Table S1.** Ingredients and chemical composition of forage basal diet and concentrate.

| Item                              | Concentrate | Basal Diet |
|-----------------------------------|-------------|------------|
| Ingredients composition (g/kg DM) |             |            |
| Maize silage                      |             | 317        |
| Grass silage                      |             | 683        |
| Maize                             | 318         |            |
| Soybean meal                      | 245         |            |
| Wheat middlings                   | 174         |            |
| Palm kernel meal                  | 120         |            |
| Hydrogenated palm fat             | 25          |            |
| Malt culms                        | 30          |            |
| Cane bagasse                      | 30          |            |
| Rapeseed meal                     | 30          |            |
| Sunflower meal                    | 10          |            |
| Barley                            | 9           |            |
| Oil palm hydrogenated fat (99%)   | 6.8         |            |
| <sup>1</sup> Cows NUTEMIX         | 2           |            |
| Sodium chloride                   | 0.2         |            |
| Chemical composition (% of DM)    |             |            |
| UFL                               | 1.02        |            |
| DM                                | 90          | 24         |
| Crude ash                         | 6.6         | 8.8        |
| Starch                            | 25          | 4.0        |
| Crude protein                     | 19          | 12         |
| Neutral detergent fiber           | 21          | 49         |
| Acid detergent fiber              | 10          | 27         |
| Fat                               | 6.2         |            |

UFL: forage unit for lactation; DM: dry matter; <sup>1</sup>Contained: calcium (17 g/kg), magnesium (25 g/kg), sodium (40 g/kg), phosphorus (52 g/kg), zinc (15 g/kg), manganese (14 g/kg), copper (1.7 g/kg), iodine (130 mg/kg), cobalt (39 mg/kg), selenium (2 mg/kg).

**Table S2.** Main microbial phyla of rumen samples of cows fed a conventional concentrate and a concentrate with chitosan

| Phylum (clr_RA)    | HF     |        | BS     |        | SEM    | Adjusted P-value |       |               |
|--------------------|--------|--------|--------|--------|--------|------------------|-------|---------------|
|                    | CTR    | CHI    | CTR    | CHI    |        | Treat            | Breed | Treat x Breed |
| Euryarchaeota      | 1.10   | 0.53   | 0.75   | 0.87   | 0.198  | 0.704            | 0.988 | 0.361         |
| Actinobacteria     | 0.030  | 0.253  | 0.302  | 0.193  | 0.1323 | 0.905            | 0.988 | 0.471         |
| Bacteroidetes      | 4.84   | 5.20   | 5.24   | 5.17   | 0.149  | 0.751            | 0.988 | 0.398         |
| Chloroflexi        | -3.22  | -3.27  | -3.47  | -3.62  | 0.233  | 0.905            | 0.988 | 0.846         |
| Cyanobacteria      | -2.57  | -1.84  | -1.86  | -2.26  | 0.360  | 0.905            | 0.988 | 0.361         |
| Elusimicrobia      | -1.74  | -1.30  | -1.94  | -1.75  | 0.220  | 0.582            | 0.988 | 0.696         |
| Fibrobacteres      | 1.34   | 1.77   | 1.65   | 1.71   | 0.214  | 0.704            | 0.988 | 0.593         |
| Firmicutes         | 3.86   | 3.80   | 3.85   | 3.97   | 0.120  | 0.905            | 0.988 | 0.596         |
| Fusobacteria       | -2.20  | -2.53  | -2.45  | -2.29  | 0.142  | 0.905            | 0.988 | 0.361         |
| Kiritimatiellaeota | 0.83   | 1.11   | 1.20   | 0.97   | 0.239  | 0.933            | 0.988 | 0.575         |
| Lentisphaerae      | -0.229 | 0.096  | -0.078 | -0.272 | 0.2621 | 0.905            | 0.988 | 0.575         |
| Planctomycetes     | -2.54  | -2.65  | -2.63  | -2.68  | 0.120  | 0.878            | 0.988 | 0.846         |
| Proteobacteria     | 1.66   | 1.81   | 1.76   | 2.03   | 0.244  | 0.819            | 0.988 | 0.846         |
| Spirochaetes       | 0.36   | 1.12   | 0.66   | 0.74   | 0.119  | 0.100            | 0.988 | 0.361         |
| Synergistetes      | -2.91  | -2.68  | -2.66  | -2.85  | 0.282  | 0.933            | 0.988 | 0.596         |
| Tenericutes        | -1.16  | -0.49  | -0.84  | -0.68  | 0.161  | 0.294            | 0.988 | 0.361         |
| Verrucomicrobia    | -1.67  | -1.81  | -1.85  | -1.78  | 0.151  | 0.905            | 0.988 | 0.593         |
| Ascomycota         | 0.37   | -0.385 | -0.084 | -0.068 | 0.2307 | 0.504            | 0.988 | 0.361         |
| Basidiomycota      | -0.44  | -1.35  | -0.96  | -0.92  | 0.217  | 0.504            | 0.988 | 0.361         |
| Chytridiomycota    | 1.20   | 0.36   | 0.78   | 0.80   | 0.221  | 0.504            | 0.988 | 0.361         |
| Ciliophora         | 3.08   | 2.27   | 2.66   | 2.72   | 0.223  | 0.504            | 0.988 | 0.361         |

RA\_clr: relative abundance CLR-transformed; HF: Holstein-friesian; BS: brown Swiss; CTR: control; CHI: chitosan; SEM: standard error of the mean; Treat: treatment; Adjust P-value: adjusted P-value using False Discovery Rate.

**Table S3.** Main microbial genera of rumen samples of cows fed a conventional concentrate and a concentrate with chitosan

| Genus (clr_RA)         | HF    |        | BS    |        | SEM    | Adjusted P-value |       |                     |
|------------------------|-------|--------|-------|--------|--------|------------------|-------|---------------------|
|                        | CTR   | CHI    | CTR   | CHI    |        | Treat            | Breed | Treat<br>x<br>Breed |
| Archaea                |       |        |       |        |        |                  |       |                     |
| Methanobrevibacter     | 2.05  | 1.64   | 1.63  | 1.85   | 0.217  | 0.686            | 0.991 | 0.281               |
| Methanospaera          | 0.94  | 0.14   | 0.77  | 0.45   | 0.207  | 0.100            | 0.991 | 0.281               |
| UC_Methanobacteriaceae | 0.76  | 0.37   | 0.69  | 0.62   | 0.131  | 0.244            | 0.991 | 0.281               |
| UC_Methanobacteriales  | 0.57  | 0.19   | 0.39  | 0.40   | 0.127  | 0.244            | 0.991 | 0.281               |
| UC_Methanobacteria     | 0.138 | -0.235 | 0.008 | -0.003 | 0.1320 | 0.244            | 0.991 | 0.281               |
| Bacteria               |       |        |       |        |        |                  |       |                     |
| Aeriscardovia          | 1.17  | 1.48   | 1.60  | 1.33   | 0.179  | 0.953            | 0.991 | 0.569               |
| Bifidobacterium        | -2.11 | -0.43  | -2.30 | -1.93  | 0.471  | 0.651            | 0.991 | 0.682               |
| UC_Bifidobacteriaceae  | -0.99 | -0.68  | -0.86 | -1.12  | 0.152  | 0.953            | 0.991 | 0.569               |
| UC_Bifidobacteriales   | -1.38 | -1.09  | -0.86 | -1.09  | 0.125  | 0.906            | 0.991 | 0.569               |
| UC_Actynomicetia       | -0.96 | -1.05  | -0.84 | -1.03  | 0.201  | 0.801            | 0.991 | 0.935               |
| UC_Coriobacteriia      | -1.69 | -1.60  | -1.50 | -1.40  | 0.202  | 0.853            | 0.991 | 0.996               |
| UC_Actinobacteria      | -0.84 | -0.68  | -0.58 | -0.64  | 0.146  | 0.887            | 0.991 | 0.847               |
| Bacteroides            | 1.57  | 1.84   | 1.71  | 1.71   | 0.155  | 0.801            | 0.991 | 0.814               |
| UC_Bacteroidaceae      | 3.79  | 4.19   | 4.18  | 4.11   | 0.143  | 0.750            | 0.991 | 0.569               |
| Barnesiella            | -1.85 | -1.07  | -1.37 | -1.41  | 0.220  | 0.676            | 0.991 | 0.569               |
| UC_Muribaculaceae      | 2.20  | 2.17   | 2.03  | 2.29   | 0.264  | 0.853            | 0.991 | 0.880               |
| UC_Paludibacteraceae   | 3.32  | 3.46   | 3.45  | 3.48   | 0.149  | 0.853            | 0.991 | 0.928               |
| Phocaeicola            | -0.88 | -0.22  | -0.41 | -0.42  | 0.182  | 0.676            | 0.991 | 0.569               |
| Alloprevotella         | -0.76 | -0.34  | -0.32 | -0.43  | 0.155  | 0.758            | 0.991 | 0.569               |
| Paraprevotella         | -1.59 | -1.52  | -1.66 | -1.34  | 0.251  | 0.801            | 0.991 | 0.893               |
| Prevotella             | 5.90  | 6.47   | 6.47  | 6.26   | 0.207  | 0.790            | 0.991 | 0.569               |
| UC_Prevotellaceae      | 3.67  | 4.27   | 4.33  | 4.08   | 0.249  | 0.801            | 0.991 | 0.569               |
| Alistipes              | -1.14 | -0.83  | -1.25 | -1.05  | 0.180  | 0.676            | 0.991 | 0.928               |
| UC_Rikenellaceae       | 0.10  | 0.51   | 0.36  | 0.43   | 0.146  | 0.676            | 0.991 | 0.693               |
| UC_Salinivirgaceae     | -0.79 | -0.48  | -0.68 | -0.80  | 0.079  | 0.750            | 0.991 | 0.464               |
| Parabacteroides        | -1.25 | -0.87  | -1.05 | -0.96  | 0.154  | 0.676            | 0.991 | 0.814               |
| UC_Tanerellaceae       | -1.85 | -1.54  | -1.90 | -1.64  | 0.155  | 0.676            | 0.991 | 0.935               |
| UC_Bacteroidales       | 5.25  | 5.63   | 5.58  | 5.51   | 0.125  | 0.750            | 0.991 | 0.569               |
| UC_Bacteroidia         | 2.95  | 3.37   | 3.36  | 3.21   | 0.166  | 0.801            | 0.991 | 0.569               |
| UC_Flavobacteriales    | -1.18 | -1.46  | -1.16 | -1.29  | 0.117  | 0.676            | 0.991 | 0.871               |
| Chryseobacterium       | -0.43 | -0.78  | -0.61 | -0.66  | 0.210  | 0.758            | 0.991 | 0.871               |
| UC_Flavobacteriia      | -1.35 | -1.38  | -1.30 | -1.36  | 0.145  | 0.875            | 0.991 | 0.944               |
| UC_Bacteroidetes       | 3.02  | 3.34   | 3.34  | 3.20   | 0.147  | 0.822            | 0.991 | 0.569               |
| UC_Cyanobacteria       | -0.92 | -0.06  | -0.08 | -0.62  | 0.446  | 0.875            | 0.991 | 0.569               |
| UC_Elusimicrobiaceae   | -1.10 | -0.37  | -1.44 | -1.28  | 0.302  | 0.676            | 0.991 | 0.814               |
| UC_Elusimicrobia       | -0.51 | -0.05  | -0.56 | -0.47  | 0.277  | 0.758            | 0.991 | 0.871               |
| Fibrobacter            | 2.98  | 3.54   | 3.39  | 3.36   | 0.264  | 0.758            | 0.991 | 0.722               |
| UC_Fibrobacteraceae    | 0.001 | 0.527  | 0.236 | 0.211  | 0.2031 | 0.750            | 0.991 | 0.689               |
| UC_Fibrobacterales     | -0.51 | -0.17  | -0.33 | -0.29  | 0.170  | 0.758            | 0.991 | 0.814               |
| UC_Fibrobacteria       | -1.03 | -0.77  | -1.10 | -0.89  | 0.183  | 0.750            | 0.991 | 0.935               |

|                        |        |        |        |        |        |       |       |       |
|------------------------|--------|--------|--------|--------|--------|-------|-------|-------|
| UC_Fibrobacteres       | -1.58  | -1.04  | -1.20  | -1.34  | 0.130  | 0.676 | 0.991 | 0.464 |
| Bacillus               | -1.94  | -1.66  | -1.72  | -1.87  | 0.242  | 0.922 | 0.991 | 0.814 |
| Staphylococcus         | -1.11  | -0.32  | -1.00  | -1.04  | 0.371  | 0.758 | 0.991 | 0.722 |
| UC_Bacillales          | -1.30  | -1.38  | -1.03  | -1.21  | 0.134  | 0.758 | 0.991 | 0.928 |
| Leuconostoc            | -3.64  | -1.83  | -3.10  | -2.83  | 0.555  | 0.676 | 0.991 | 0.682 |
| UC_Lactobacillaceae    | -2.32  | -2.41  | -2.34  | -2.56  | 0.255  | 0.847 | 0.991 | 0.935 |
| Streptococcus          | -1.32  | -1.48  | -1.46  | -1.49  | 0.191  | 0.853 | 0.991 | 0.928 |
| UC_Lactobacillales     | -0.70  | -0.98  | -0.77  | -0.75  | 0.169  | 0.801 | 0.991 | 0.815 |
| UC_Bacilli             | 2.82   | 2.70   | 2.88   | 2.81   | 0.097  | 0.758 | 0.991 | 0.928 |
| Clostridium            | 0.96   | 0.99   | 0.93   | 1.02   | 0.133  | 0.853 | 0.991 | 0.935 |
| Sarcina                | -1.01  | -1.01  | -1.02  | -0.84  | 0.204  | 0.853 | 0.991 | 0.925 |
| UC_Clostridiaceae      | 0.14   | 0.03   | 0.02   | 0.12   | 0.200  | 0.982 | 0.991 | 0.814 |
| Eubacterium            | 0.93   | 1.35   | 1.43   | 1.30   | 0.174  | 0.801 | 0.991 | 0.569 |
| UC_Eubacteriaceae      | -0.38  | -0.66  | -0.40  | -0.50  | 0.136  | 0.676 | 0.991 | 0.871 |
| Agathobacter           | -1.74  | -1.30  | -1.34  | -1.30  | 0.354  | 0.807 | 0.991 | 0.880 |
| Blautia                | -1.39  | -1.52  | -1.89  | -1.73  | 0.193  | 0.953 | 0.991 | 0.871 |
| Butyrivibrio           | 1.83   | 2.01   | 1.88   | 2.00   | 0.178  | 0.790 | 0.991 | 0.935 |
| Coproccoccus           | -1.81  | -1.51  | -2.32  | -1.71  | 0.220  | 0.651 | 0.991 | 0.871 |
| Oribacterium           | -0.518 | 0.164  | -0.024 | -0.047 | 0.209  | 0.676 | 0.991 | 0.569 |
| Pseudobutyrvibrio      | 0.34   | 0.67   | 0.64   | 0.74   | 0.212  | 0.758 | 0.991 | 0.880 |
| Roseburia              | -0.74  | 0.33   | -0.50  | -0.11  | 0.359  | 0.651 | 0.991 | 0.814 |
| Stomatobaculum         | -0.398 | -0.022 | -0.580 | -0.662 | 0.244  | 0.847 | 0.991 | 0.814 |
| UC_Lachnospiraceae     | 3.16   | 3.31   | 3.30   | 3.34   | 0.098  | 0.758 | 0.991 | 0.878 |
| Ruminiclostridium      | -1.77  | -2.72  | -1.46  | -1.72  | 0.319  | 0.676 | 0.991 | 0.748 |
| Ruminococcus           | 2.15   | 2.75   | 2.58   | 2.62   | 0.139  | 0.651 | 0.991 | 0.569 |
| UC_Oscillospiraceae    | 3.13   | 3.26   | 3.14   | 3.23   | 0.150  | 0.801 | 0.991 | 0.935 |
| UC_Eubacteriales       | 4.01   | 4.00   | 4.01   | 4.07   | 0.097  | 0.887 | 0.991 | 0.928 |
| UC_Clostridia          | 4.11   | 3.91   | 4.03   | 3.99   | 0.104  | 0.758 | 0.991 | 0.847 |
| Sharpea                | -3.78  | -2.15  | -3.13  | -2.32  | 0.773  | 0.676 | 0.991 | 0.880 |
| UC_Erysipelotrichaceae | 0.68   | 1.18   | 0.81   | 0.99   | 0.120  | 0.464 | 0.991 | 0.689 |
| UC_Erysipelotrichales  | -0.76  | -0.17  | -0.56  | -0.14  | 0.263  | 0.676 | 0.991 | 0.928 |
| UC_Erysipelotrichia    | -0.72  | -0.64  | -0.74  | -0.59  | 0.107  | 0.758 | 0.991 | 0.928 |
| Succiniclacticum       | 1.54   | 1.49   | 1.58   | 1.64   | 0.242  | 0.982 | 0.991 | 0.935 |
| Acidaminococcaceae     | 1.38   | 1.36   | 1.45   | 1.53   | 0.200  | 0.946 | 0.991 | 0.928 |
| Quinella               | -0.83  | -1.31  | -0.98  | -1.14  | 0.156  | 0.651 | 0.991 | 0.791 |
| Anaerovibrio           | -0.035 | 1.110  | 0.655  | 0.685  | 0.2871 | 0.651 | 0.991 | 0.569 |
| Schwartzia             | -0.003 | 0.376  | 0.488  | 0.580  | 0.1823 | 0.750 | 0.991 | 0.847 |
| Selenomonas            | 0.79   | 1.85   | 1.63   | 1.58   | 0.312  | 0.676 | 0.991 | 0.569 |
| UC_Selenomonadaceae    | -0.595 | 0.094  | -0.074 | -0.102 | 0.2252 | 0.676 | 0.991 | 0.569 |
| UC_Selenomonadales     | -1.41  | -0.92  | -1.16  | -1.16  | 0.208  | 0.750 | 0.991 | 0.693 |
| UC_Negativicutes       | -0.34  | -0.26  | -0.17  | -0.18  | 0.089  | 0.868 | 0.991 | 0.885 |
| Megasphaera            | -3.78  | -3.87  | -3.36  | -3.06  | 0.321  | 0.868 | 0.991 | 0.878 |
| UC_Firmicutes          | 3.75   | 3.74   | 3.77   | 3.80   | 0.055  | 0.940 | 0.991 | 0.925 |
| Fusobacterium          | -1.69  | -1.86  | -1.71  | -1.68  | 0.165  | 0.853 | 0.991 | 0.878 |
| UC_Kiritimatiellae     | 2.54   | 2.95   | 2.99   | 2.67   | 0.301  | 0.946 | 0.991 | 0.693 |
| UC_Kiritimatiellaeota  | -0.72  | -0.56  | -0.51  | -0.76  | 0.239  | 0.940 | 0.991 | 0.814 |
| UC_Lentisphaeria       | -0.37  | 0.15   | -0.21  | -0.34  | 0.275  | 0.801 | 0.991 | 0.693 |
| UC_Victivallales       | 0.313  | 0.576  | 0.333  | 0.017  | 0.443  | 0.979 | 0.991 | 0.871 |

|                        |        |        |        |        |        |       |       |       |
|------------------------|--------|--------|--------|--------|--------|-------|-------|-------|
| UC_Lentisphaerae       | 0.89   | 1.37   | 1.23   | 0.89   | 0.321  | 0.940 | 0.991 | 0.693 |
| UC_Planctomycetes      | -1.63  | -1.99  | -1.80  | -1.94  | 0.179  | 0.676 | 0.991 | 0.878 |
| Acetobacter            | -1.026 | 0.010  | -0.055 | -0.238 | 0.495  | 0.800 | 0.991 | 0.693 |
| UC_Alphaproteobacteria | 0.55   | 1.29   | 1.00   | 0.77   | 0.224  | 0.758 | 0.991 | 0.569 |
| UC_Betaproteobacteria  | -1.90  | -1.32  | -1.94  | -1.76  | 0.274  | 0.676 | 0.991 | 0.871 |
| Desulfovibrio          | -0.82  | -1.00  | -0.96  | -0.84  | 0.245  | 0.953 | 0.991 | 0.878 |
| Ruminobacter           | 0.020  | 0.483  | 0.229  | 0.440  | 0.602  | 0.853 | 0.991 | 0.935 |
| Succinomonas           | 0.11   | 0.39   | 0.41   | 0.69   | 0.405  | 0.801 | 0.991 | 0.996 |
| Succinivibrio          | 0.061  | 1.297  | 0.400  | 0.559  | 0.4146 | 0.676 | 0.991 | 0.693 |
| UC_Succinivibrionaceae | 2.19   | 2.34   | 2.46   | 2.75   | 0.398  | 0.853 | 0.991 | 0.935 |
| UC_Aeromonadales       | -0.392 | 0.322  | -0.308 | 0.066  | 0.3909 | 0.676 | 0.991 | 0.925 |
| Escherichia            | -1.43  | -1.56  | -1.15  | -1.30  | 0.275  | 0.853 | 0.991 | 0.987 |
| Klebsiella             | 0.86   | 0.40   | 0.52   | 0.51   | 0.093  | 0.651 | 0.991 | 0.565 |
| UC_Enterobacteriaceae  | -0.10  | -0.50  | -0.43  | -0.28  | 0.174  | 0.801 | 0.991 | 0.569 |
| UC_Enterobacterales    | -0.065 | -0.623 | -0.526 | -0.213 | 0.1693 | 0.801 | 0.991 | 0.464 |
| Acinetobacter          | -0.75  | -0.65  | -0.69  | -0.77  | 0.269  | 0.982 | 0.991 | 0.928 |
| Pseudomonas            | -1.96  | -1.64  | -2.09  | -1.89  | 0.326  | 0.801 | 0.991 | 0.935 |
| UC_Gammaproteobacteria | 0.86   | 0.88   | 0.86   | 1.13   | 0.281  | 0.853 | 0.991 | 0.925 |
| Vibrio                 | -2.20  | -1.76  | -1.99  | -1.73  | 0.318  | 0.758 | 0.991 | 0.928 |
| UC_Proteobacteria      | 1.21   | 1.31   | 1.21   | 1.26   | 0.148  | 0.853 | 0.991 | 0.935 |
| Treponema              | 1.48   | 2.54   | 1.96   | 1.96   | 0.171  | 0.425 | 0.991 | 0.386 |
| UC_Spirochaetaceae     | 0.064  | 0.940  | 0.426  | 0.428  | 0.1637 | 0.533 | 0.991 | 0.464 |
| UC_Spirochaetales      | 0.10   | 0.85   | 0.42   | 0.38   | 0.106  | 0.406 | 0.991 | 0.348 |
| UC_Spirochaetia        | -0.197 | 0.069  | -0.163 | -0.085 | 0.1451 | 0.750 | 0.991 | 0.871 |
| UC_Spirochaetes        | -0.46  | -0.18  | -0.38  | -0.49  | 0.118  | 0.801 | 0.991 | 0.569 |
| Pyramidobacter         | -2.11  | -1.51  | -1.52  | -1.78  | 0.361  | 0.853 | 0.991 | 0.693 |
| UC_Acholeplasmatales   | -1.48  | -0.79  | -0.99  | -1-10  | 0.200  | 0.676 | 0.991 | 0.569 |
| Anaeroplasma           | -0.85  | 0.57   | -0.19  | 0.12   | 0.175  | 0.046 | 0.991 | 0.386 |
| Mycoplasma             | -2.08  | -1.58  | -1.61  | -1.87  | 0.314  | 0.868 | 0.991 | 0.693 |
| UC_Mollicutes          | -1.21  | -0.74  | -1.00  | -0.92  | 0.130  | 0.651 | 0.991 | 0.587 |
| UC_Tenericutes         | -1.18  | -0.79  | -0.94  | -0.98  | 0.169  | 0.758 | 0.991 | 0.569 |
| UC_Opitutae            | -1.68  | -1.55  | -2.09  | -1.92  | 0.312  | 0.853 | 0.991 | 0.976 |
| UC_Verrucomicrobia     | -0.41  | -0.33  | -0.37  | -0.39  | 0.138  | 0.940 | 0.991 | 0.928 |
| <i>Eukaryota</i>       |        |        |        |        |        |       |       |       |
| Sacharomyces           | -1.28  | -1.84  | -1.67  | -1.58  | 0.237  | 0.408 | 0.991 | 0.239 |
| UC_Sacharomycetaceae   | -1.22  | -2.10  | -1.88  | -1.97  | 0.194  | 0.133 | 0.991 | 0.207 |
| UC_Sacharomycetales    | -0.81  | -1.19  | -1.30  | -1.21  | 0.231  | 0.582 | 0.991 | 0.370 |
| UC_Sordariomycetes     | -1.59  | -2.14  | -1.89  | -1.93  | 0.266  | 0.372 | 0.991 | 0.382 |
| UC_Ascomycota          | 0.88   | 0.25   | 0.48   | 0.42   | 0.181  | 0.134 | 0.991 | 0.208 |
| UC_Agarycomycetes      | -0.18  | -0.83  | -0.45  | -0.56  | 0.184  | 0.134 | 0.991 | 0.217 |
| UC_Basidiomycota       | -0.47  | -1.29  | -1.16  | -0.92  | 0.180  | 0.189 | 0.991 | 0.207 |
| Anaeromyces            | 0.71   | -0.046 | 0.27   | 0.23   | 0.175  | 0.133 | 0.991 | 0.207 |
| Neocallimastix         | 1.93   | 1.26   | 1.64   | 1.51   | 0.163  | 0.133 | 0.991 | 0.208 |
| Piromyces              | 1.25   | 0.45   | 0.87   | 0.77   | 0.170  | 0.133 | 0.991 | 0.207 |
| UC_Neocallimastigaceae | 1.73   | 1.06   | 1.40   | 1.37   | 0.179  | 0.134 | 0.991 | 0.207 |
| Nyctotherus            | -1.63  | -2.28  | -2.41  | -2.15  | 0.260  | 0.518 | 0.991 | 0.207 |
| Stentor                | 2.68   | 1.95   | 2.31   | 2.27   | 0.168  | 0.133 | 0.991 | 0.207 |
| Entodinium             | 2.48   | 1.79   | 2.05   | 2.05   | 0.162  | 0.133 | 0.991 | 0.207 |

|                     |       |        |       |       |        |       |       |       |
|---------------------|-------|--------|-------|-------|--------|-------|-------|-------|
| Epidinium           | -0.51 | -3.04  | -1.68 | -1.98 | 0.565  | 0.133 | 0.991 | 0.207 |
| Eudiplodinium       | -1.51 | -1.68  | -1.45 | -1.40 | 0.228  | 0.804 | 0.991 | 0.645 |
| Polyplastron        | -0.88 | -2.34  | -1.91 | -1.53 | 0.527  | 0.397 | 0.991 | 0.207 |
| Isotricha           | -0.51 | -0.98  | -0.79 | -0.76 | 0.185  | 0.356 | 0.991 | 0.239 |
| Ichthyophthirius    | 2.54  | 1.73   | 2.03  | 2.07  | 0.181  | 0.133 | 0.991 | 0.207 |
| Tetrahymena         | 1.67  | 1.06   | 1.45  | 1.34  | 0.163  | 0.133 | 0.991 | 0.208 |
| UC_Hymenostomatida  | 0.536 | -0.098 | 0.250 | 0.225 | 0.1508 | 0.133 | 0.991 | 0.207 |
| Paramecium          | 2.36  | 1.71   | 2.08  | 2.00  | 0.167  | 0.133 | 0.991 | 0.207 |
| Pseudocohnilembus   | 1.46  | 0.82   | 1.14  | 1.06  | 0.165  | 0.133 | 0.991 | 0.207 |
| UC_Oligohymenophora | 2.22  | 1.62   | 1.97  | 1.90  | 0.169  | 0.134 | 0.991 | 0.208 |
| Halteria            | 1.82  | 1.08   | 1.38  | 1.41  | 0.160  | 0.133 | 0.991 | 0.207 |
| Stylonichia         | 2.39  | 1.73   | 2.14  | 2.07  | 0.182  | 0.134 | 0.991 | 0.208 |
| UC_Sporadotrichia   | 1.24  | 0.54   | 0.88  | 0.90  | 0.191  | 0.149 | 0.991 | 0.207 |
| UC_Ciliophora       | 3.43  | 2.75   | 3.09  | 3.07  | 0.182  | 0.134 | 0.991 | 0.207 |

RA\_clr: relative abundance CLR-transformed; HF: Holstein-friesian; BS: brown Swiss; CTR: control; CHI: chitosan; SEM: standard error of the mean; T: treatment; Adjust P-value: adjusted P-value using False Discovery Rate; UC: unclassified.
